# Supplementary material
Source: publisher site journal article supplement (https://www.dovepress.com/get_supplementary_file.php?f=348343.docx)
Supplement: Supplementary file 1 [file get_supplementary_file.php]

**Supplementary material**
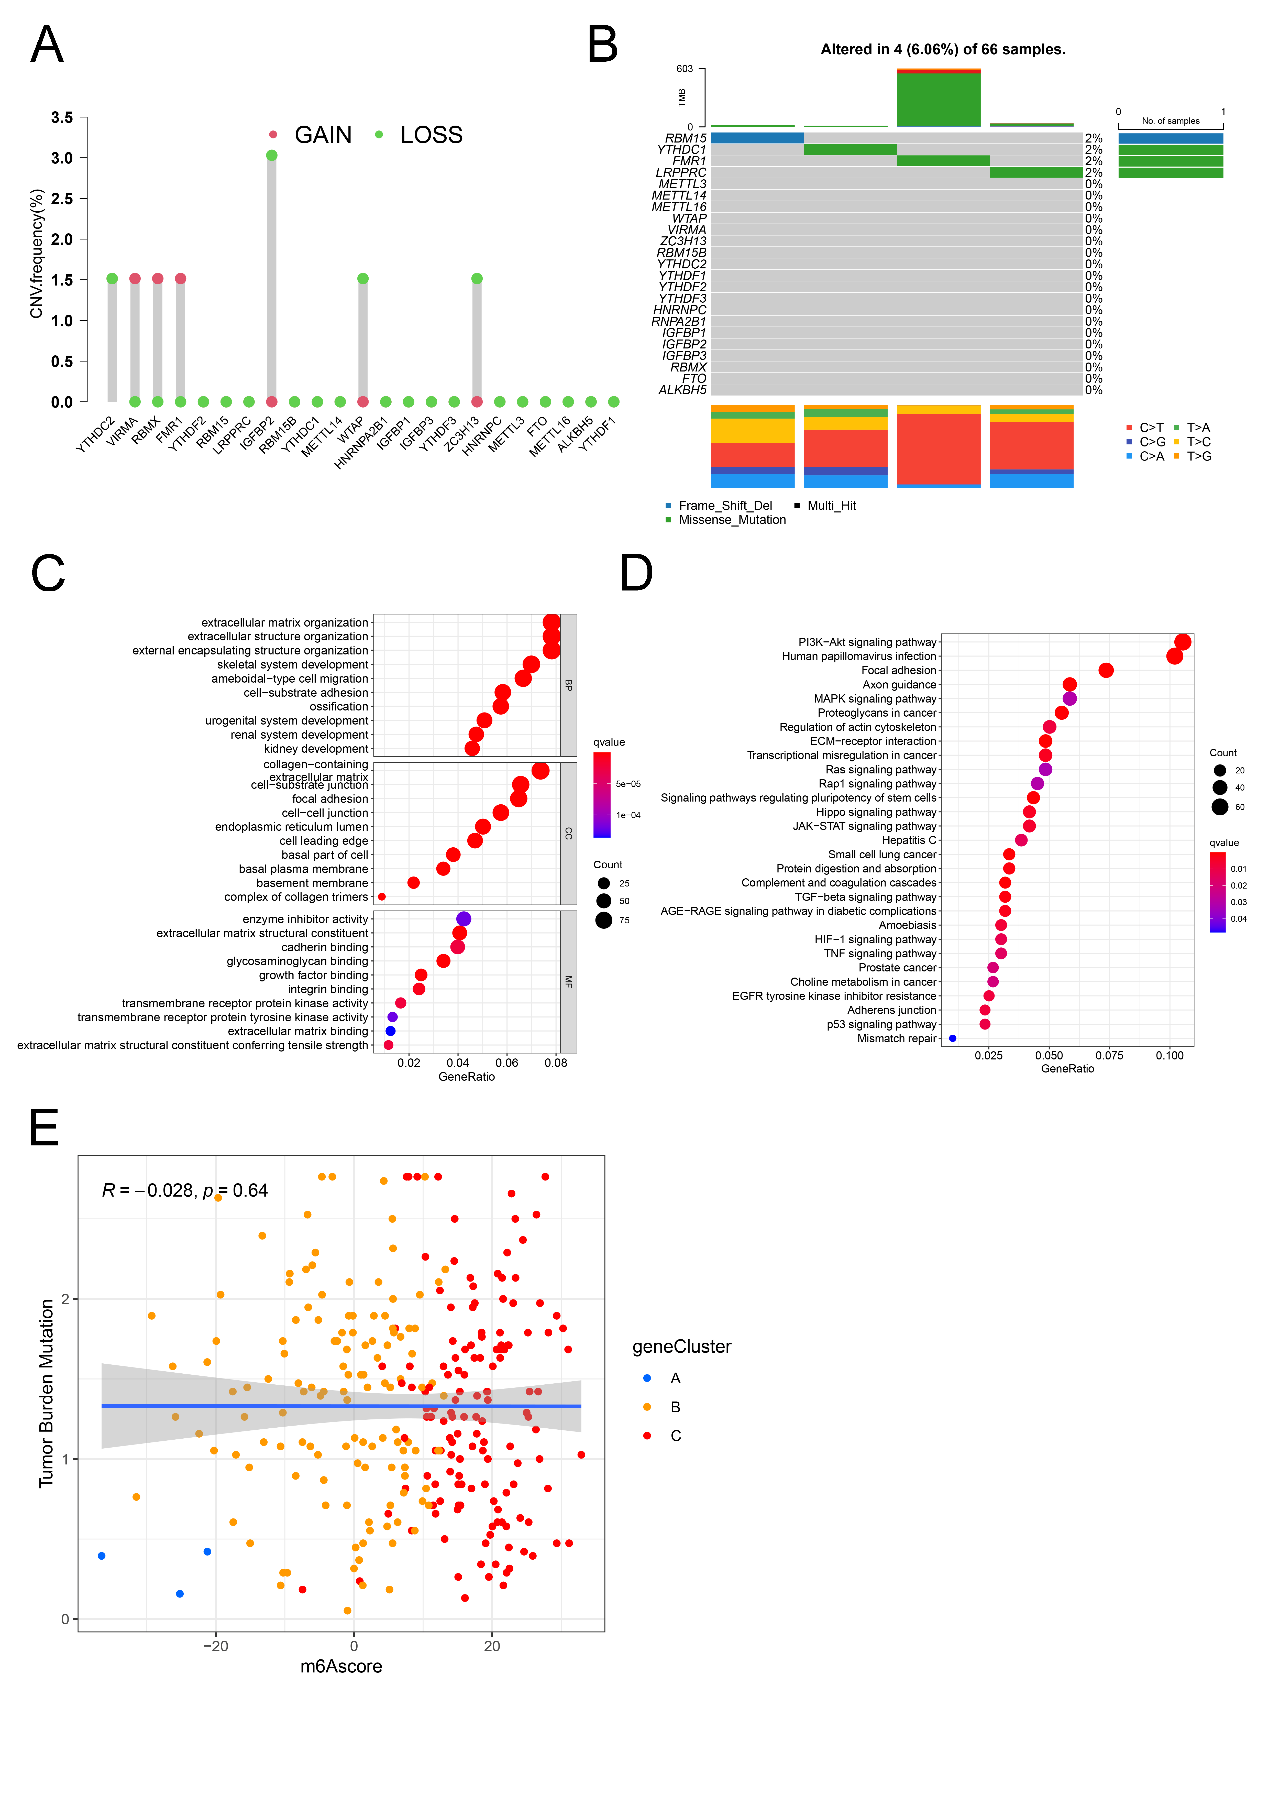
**Figure S1** Gene mutation and pathway enrichment analysis of m6A regulators in KICH.(A) Dumbbell plot depicted the CNV alteration frequency of m6A regulators in KICH. Amplification frequencies are marked with red dots, and deletion frequencies are marked with blue dots. (B) The mutation frequency of m6A regulators in KICH. (C-D) Go/KEGG bubble diagram showing the enrichment level of each pathway. (E) Correlation analysis of m6Ascore and tumor mutation burden.
